# Supplementary material for: Synergistic effect in the heterostructure of ZnCo2O4 and hydrogenated zinc oxide nanorods for high capacitive response
Source: Royal Society of Chemistry journal article supplement (doi:10.1039/c7nr01644a), 2017-01-01
Supplement: c7nr01644a1.pdf [file c7nr01644a1.pdf]

## Supporting Information

for

### **Synergistic Effect in Heterostructure of $\text{ZnCo}_2\text{O}_4$ and Hydrogenated Zinc Oxide Nanorods for High Capacitive Response**

Buddha Deka Boruah, Arnab Maji and Abha Misra<sup>1</sup>

Department of Instrumentation and Applied Physics, Indian Institute of Science, Bangalore, Karnataka,

India 560012

---

<sup>1</sup> Corresponding Author: Abha Misra, Email: [abha.misra1@gmail.com](mailto:abha.misra1@gmail.com)

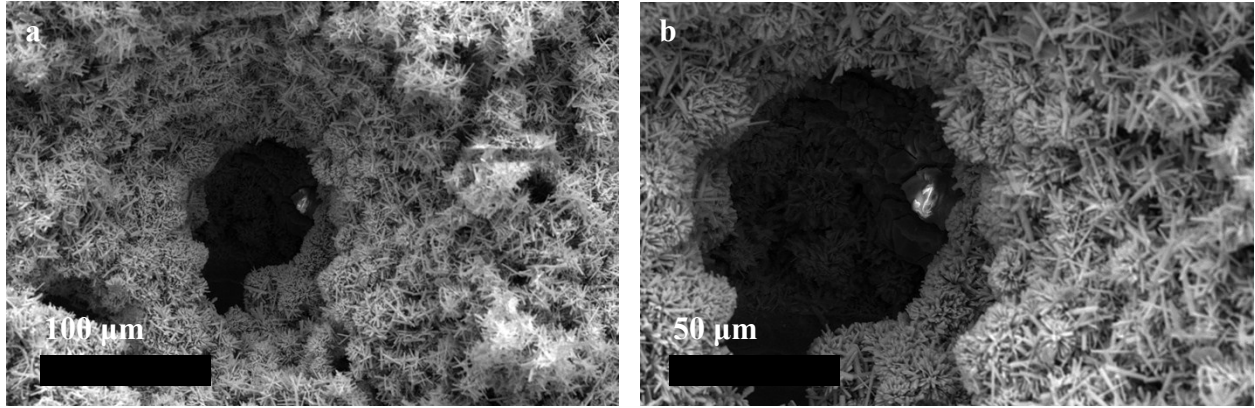

Fig. S1: (a) and (b) are the low-magnification SEM images of as-grown ZnCo<sub>2</sub>O<sub>4</sub>/H:ZnO NRs on NiF.

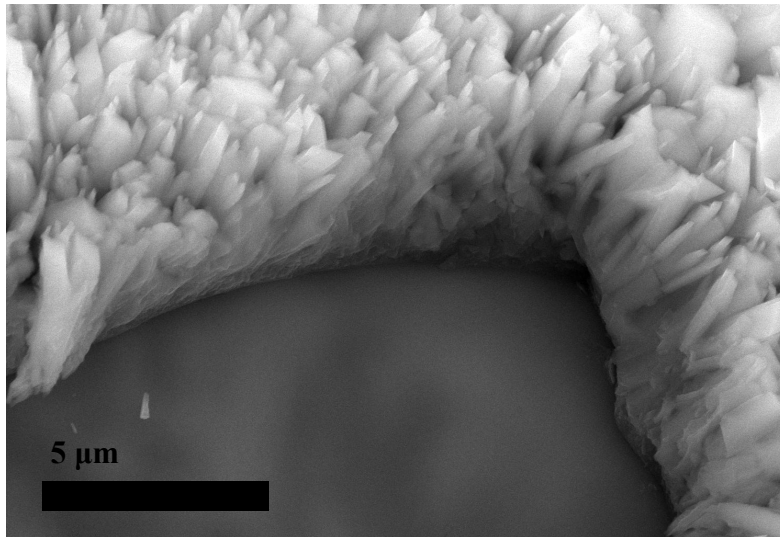

Fig. S2: Cross-sectional SEM image of as-grown ZnCo<sub>2</sub>O<sub>4</sub> on NiF.

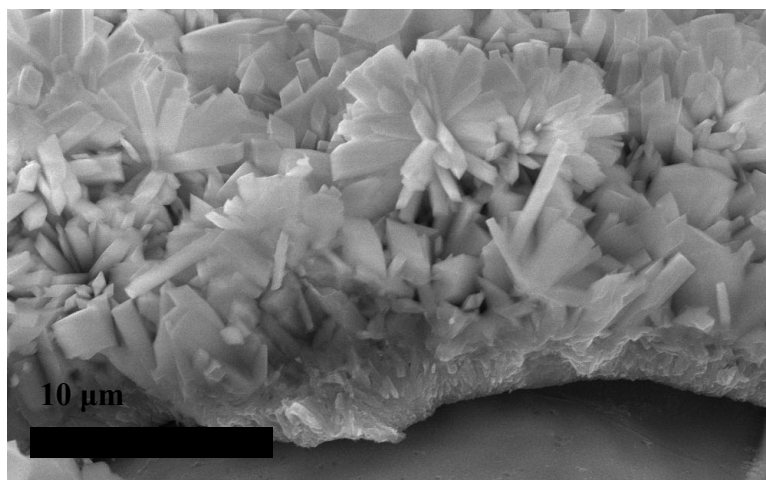

Fig. S3: Cross-sectional SEM image of as-grown  $\text{ZnCo}_2\text{O}_4/\text{H:ZnO}$  NRs on NiF.

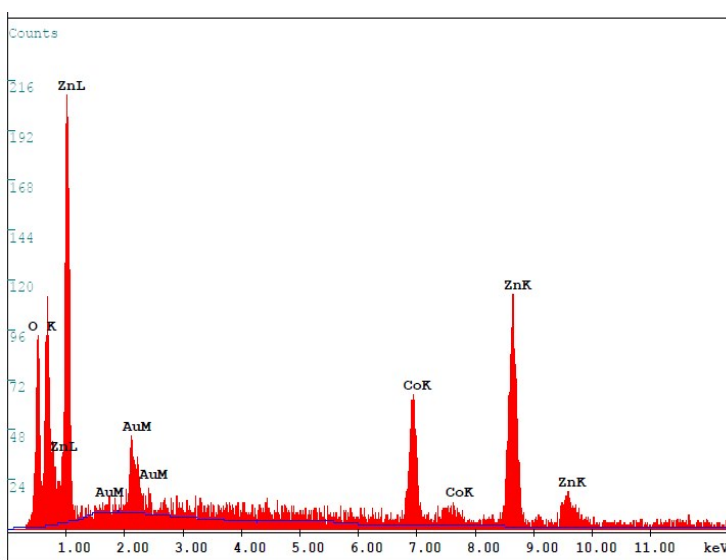

Fig. S4: EDS spectrum of  $\text{ZnCo}_2\text{O}_4/\text{H:ZnO}$  NRs

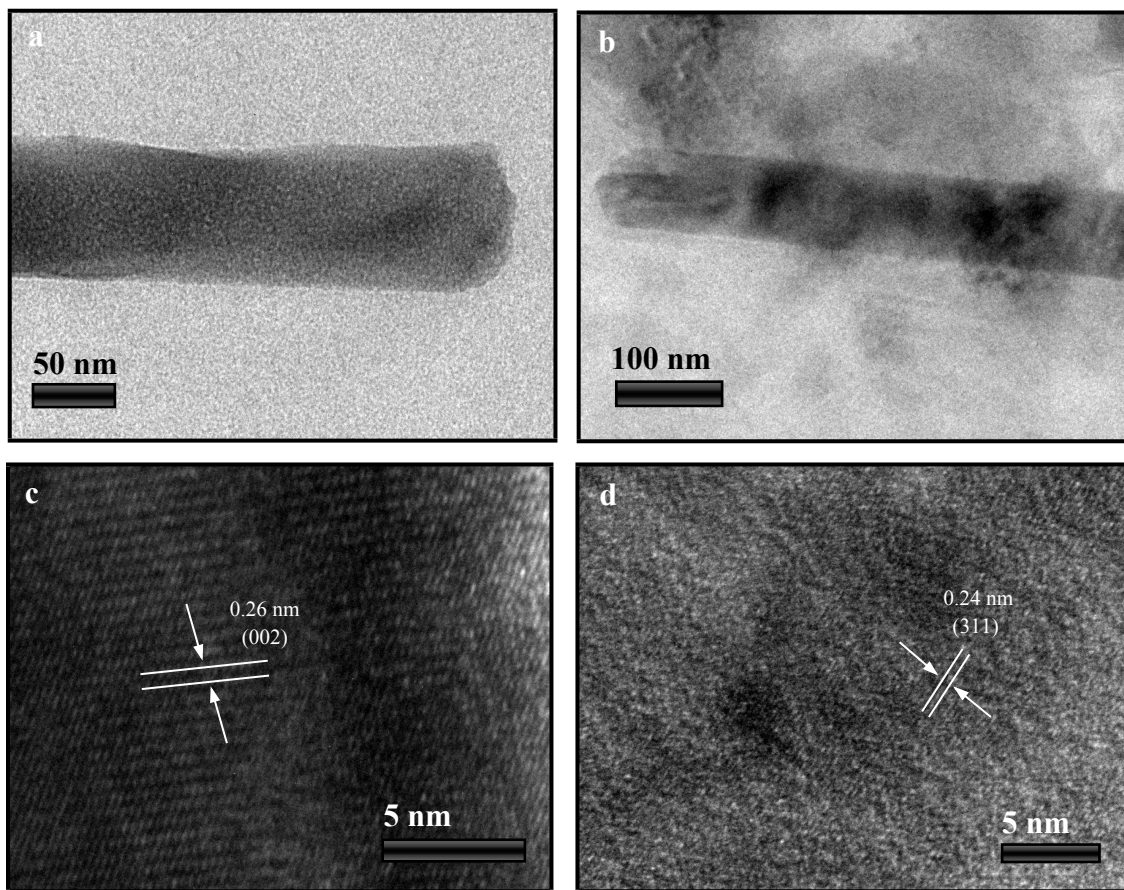

Fig. S5: TEM images ((a) and (b)) and HRTEM images ((c) and (d)) of pristine H:ZnO NR and  $\text{ZnCo}_2\text{O}_4$  NR, respectively.

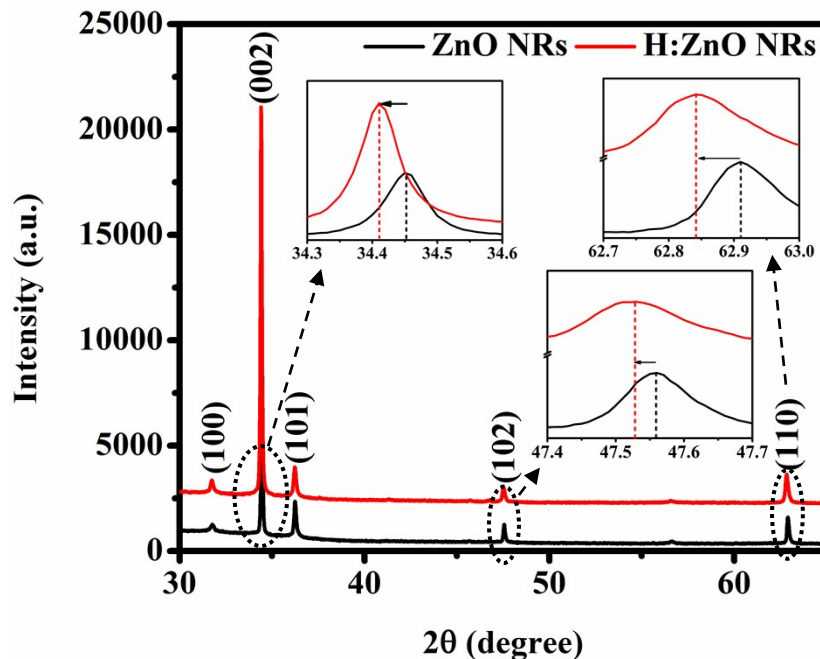

Fig. S6: Comparison XRD patterns of pristine ZnO NRs and H:ZnO NRs.

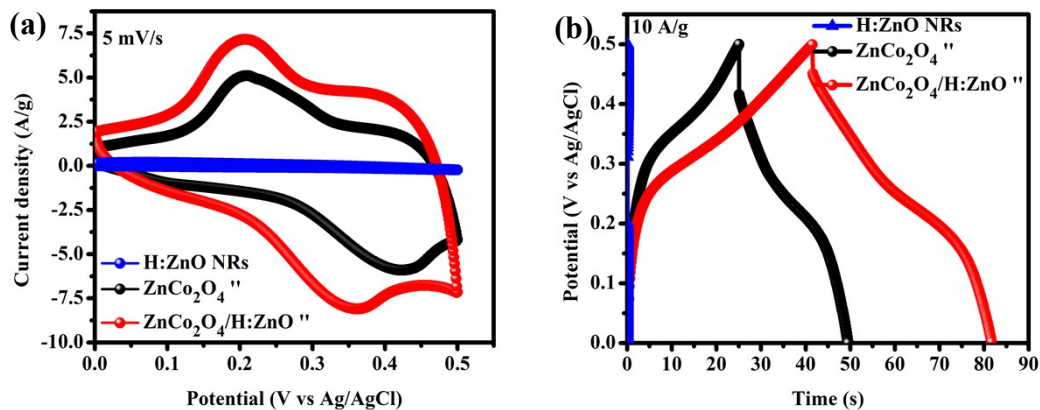

Fig. S7: (a) CV comparisons of the as-fabricated electrodes such as H:ZnO, ZnCo<sub>2</sub>O<sub>4</sub> and ZnCo<sub>2</sub>O<sub>4</sub>/H:ZnO NRs at the same scan rate of 5 mV/s with a potential window of 0 - 0.5 V. (b) Charging-discharging plot of the as-fabricated electrodes in the same potential window and same current density of 10 A/g.

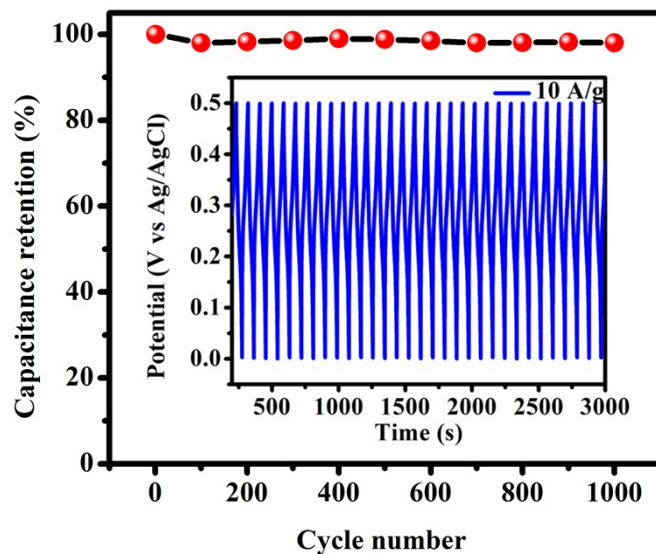

Fig. S8: Capacitance retention plot of the  $\text{ZnCo}_2\text{O}_4/\text{H:ZnO}$  NRs electrode. Inset depicts the few representative charge-discharge cycles of the electrode.

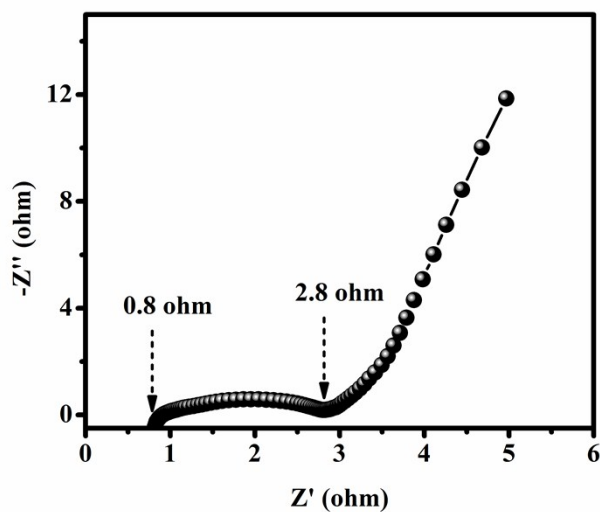

Fig. S9: Nyquist plot of the  $\text{ZnCo}_2\text{O}_4/\text{H:ZnO}$  NRs electrode.

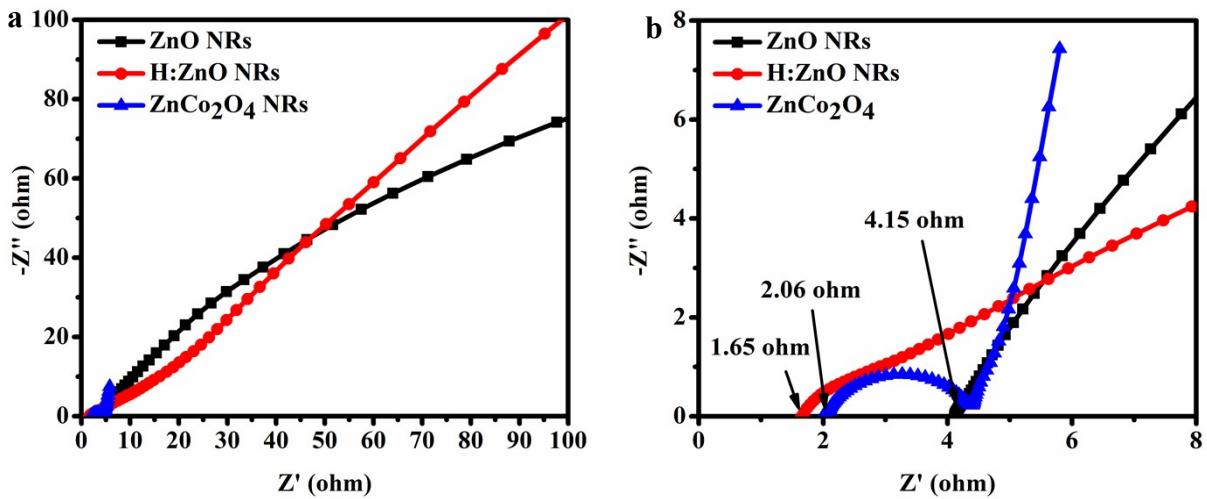

Fig. S10: Nyquist plots of ZnO NRs, H:ZnO NRs and ZnCo<sub>2</sub>O<sub>4</sub> NRs electrodes.

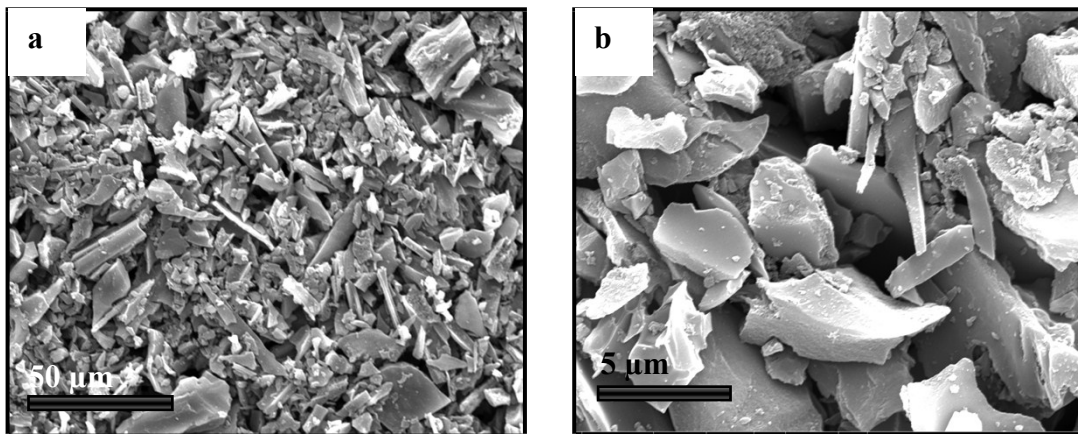

Fig. S11: SEM images of AC at (a) low and (b) high magnifications.

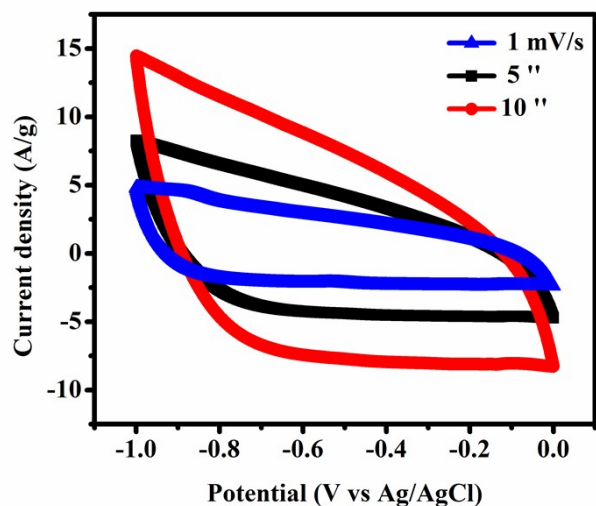

Fig. S12: CV plots of the AC electrode at different scan rates varying from 1 to 10 mV/s.

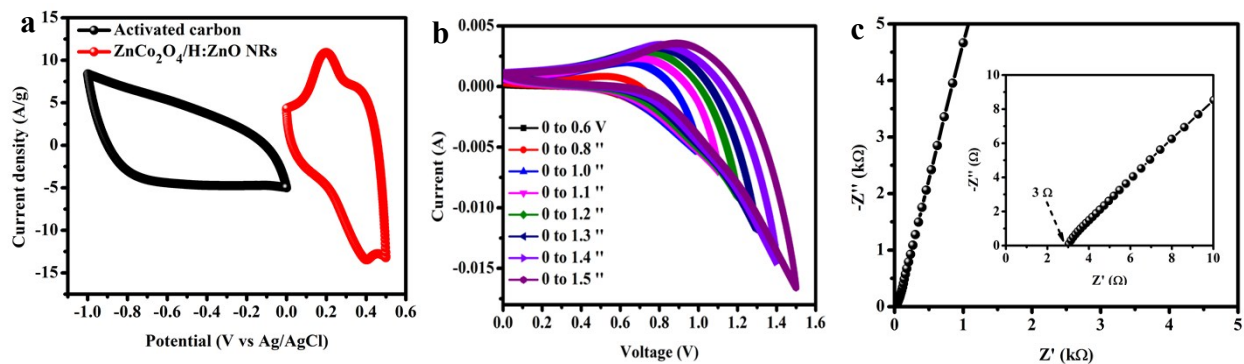

Fig. S13: (a) CV curve of  $\text{ZnCo}_2\text{O}_4/\text{H}:\text{ZnO}$  NRs and AC at the same scan rate of 5 mV/s in the respective potential windows. (b) CV analysis of the asymmetric  $\text{ZnCo}_2\text{O}_4/\text{H}:\text{ZnO}$  NRs//AC supercapacitor at different potential window in a fixed scan rate of 20 mV/s. (c) Nyquist plot of the  $\text{ZnCo}_2\text{O}_4/\text{H}:\text{ZnO}$  NRs//AC asymmetric supercapacitor (inset shows the magnified view in the high frequency range).



Table S1: Specific capacitance, energy and power densities of the ZnCo<sub>2</sub>O<sub>4</sub>/H:ZnO NRs//AC supercapacitor at different current densities.

| <b>Current density</b> | <b>Potential</b> | <b>Specific Capacitance</b> | <b>Specific Energy density</b> | <b>Specific Power density</b> |
|------------------------|------------------|-----------------------------|--------------------------------|-------------------------------|
| A/g                    | $\Delta V$ (V)   | F/g                         | Wh/kg                          | W/kg                          |
| 1                      | 1.4              | 13.8                        | 3.75667                        | 653.34                        |
| 1.6                    | 1.32             | 12.7                        | 3.0734                         | 928.99                        |
| 2                      | 1.3              | 10.67                       | 2.50449                        | 1127.02                       |

Table S2: Areal capacitance, areal energy and power densities of the ZnCo<sub>2</sub>O<sub>4</sub>/H:ZnO NRs//AC supercapacitor at different current densities.

| <b>Current</b><br>$I$ | <b>Current density</b><br>$I/A$ | <b>Discharge time</b><br>$\Delta t$ | <b>Potential</b><br>$\Delta V$ | <b>Areal Capacitance,</b><br>$C_{A,cell} = I\Delta t/A\Delta V$ | <b>Areal Energy density</b><br>$E_A = \frac{1}{2} \times \frac{C_{A,cell} \times \Delta V^2}{3600}$ | <b>Areal Power density</b><br>$P_A = \frac{E_A}{\Delta t} \times 3600$ |
|-----------------------|---------------------------------|-------------------------------------|--------------------------------|-----------------------------------------------------------------|-----------------------------------------------------------------------------------------------------|------------------------------------------------------------------------|
| mA                    | mA/cm <sup>2</sup>              | s                                   | (V)                            | mF/cm <sup>2</sup>                                              | μWh/cm <sup>2</sup>                                                                                 | μW/cm <sup>2</sup>                                                     |
| 5                     | 2.5                             | 20.7                                | 1.4                            | 37                                                              | 10.0625                                                                                             | 1750                                                                   |
| 8                     | 4                               | 11.91                               | 1.32                           | 36                                                              | 8.734                                                                                               | 2640                                                                   |
| 10                    | 5                               | 8                                   | 1.3                            | 31                                                              | 7.22222                                                                                             | 3250                                                                   |
